# Supplementary material
Source: ML conference proceedings conference paper supplement (https://proceedings.neurips.cc/paper_files/paper/2013/hash/d9fc5b73a8d78fad3d6dffe419384e70-Abstract.html)
Supplement: Supplementary file [file d9fc5b73a8d78fad3d6dffe419384e70-Supplemental.zip]

## Appendix for paper: Structured Learning via Logistic Regression

**Theorem 5.** *The difference of  $l$  and  $l_1$  is bounded by*

$$l_1(x, y, F) \leq l(x, y, F) \leq l_1(x, y, F) + \epsilon H_{\max}, \quad H_{\max} = \sum_{\alpha} \log |y_{\alpha}|.$$

*Proof.* Defining  $\mu^* = \arg \max_{\mu \in \mathcal{M}} \theta \cdot \mu$  and  $\mu' = \arg \max_{\mu \in \mathcal{M}} \theta \cdot \mu + \epsilon \sum_{\alpha} H(\mu_{\alpha})$ , one can write

$$\begin{aligned} l(x, y; F) - l_1(x, y; F) &= -F(x, y) + \max_{\mu \in \mathcal{M}} \left( \theta \cdot \mu + \sum_{\alpha} \epsilon H(\mu_{\alpha}) \right) + F(x, y) - \max_{\mu \in \mathcal{M}} \theta \cdot \mu \\ &= \max_{\mu \in \mathcal{M}} \left( \theta \cdot \mu + \sum_{\alpha} \epsilon H(\mu_{\alpha}) \right) - \max_{\mu \in \mathcal{M}} \theta \cdot \mu \\ &= \theta \cdot \mu' - \theta \cdot \mu^* + \sum_{\alpha} \epsilon H(\mu'_{\alpha}) \\ &\leq \epsilon \sum_{\alpha} \log |y_{\alpha}|. \end{aligned}$$

The last line follows from the fact that  $\theta \cdot \mu^* \geq \theta \cdot \mu'$ , and that  $H(\mu'_{\alpha}) \leq \log |y_{\alpha}|$ .  $\square$

| Denoising                                  |      |        |        |        |      | Horses                                     |      |        |        |        |      |
|--------------------------------------------|------|--------|--------|--------|------|--------------------------------------------|------|--------|--------|--------|------|
| $\mathcal{F}_i \setminus \mathcal{F}_{ij}$ | Zero | Const. | Linear | Boost. | MLP  | $\mathcal{F}_i \setminus \mathcal{F}_{ij}$ | Zero | Const. | Linear | Boost. | MLP  |
| Zero                                       | .490 | .490   | .490   | .441   | .490 | Zero                                       | .211 | .211   | .212   | .209   | .210 |
| Const.                                     | .490 | .490   | .490   | .440   | .490 | Const.                                     | .211 | .211   | .212   | .209   | .210 |
| Linear                                     | .443 | .077   | .059   | .048   | .033 | Linear                                     | .141 | .139   | .126   | .105   | .113 |
| Boost.                                     | .429 | .032   | .014   | .008   | .008 | Boost.                                     | .074 | .068   | .063   | .057   | .060 |
| MLP                                        | .435 | .031   | .014   | .008   | .008 | MLP                                        | .054 | .051   | .046   | .039   | .041 |

Table 2: Univariate Training Error Rates

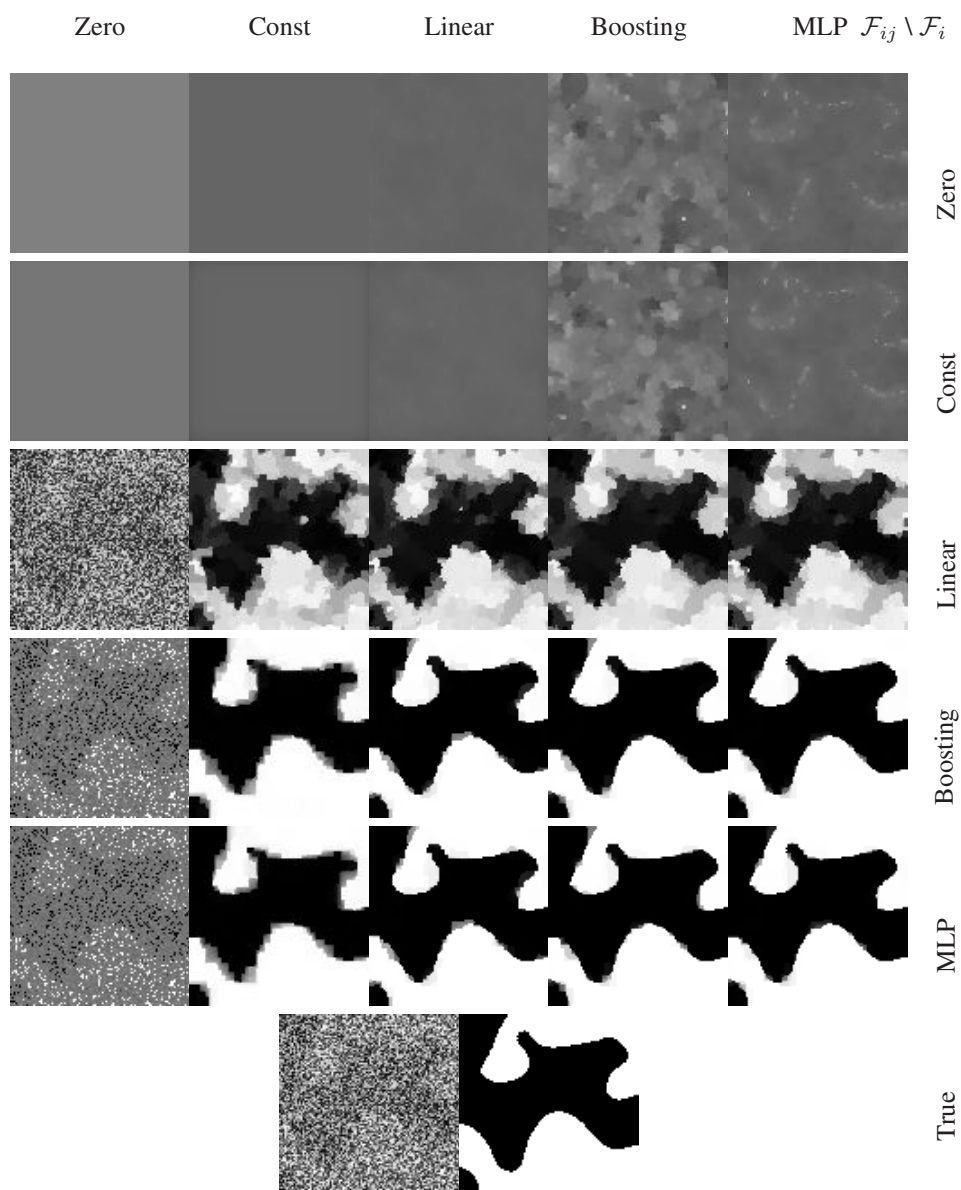

Figure 4: Example Predictions on the Denoising Dataset

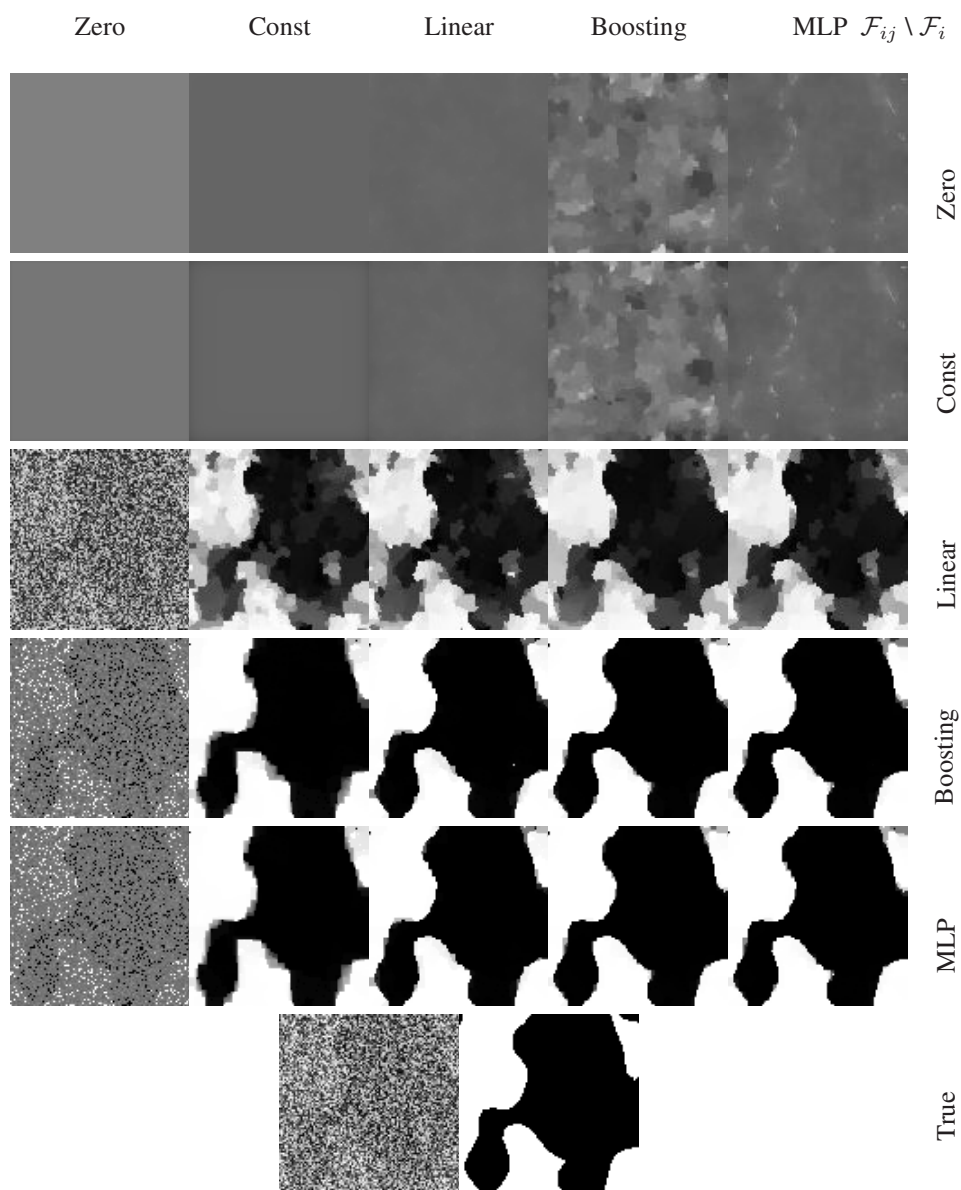

Figure 5: Example Predictions on the Denoising Dataset

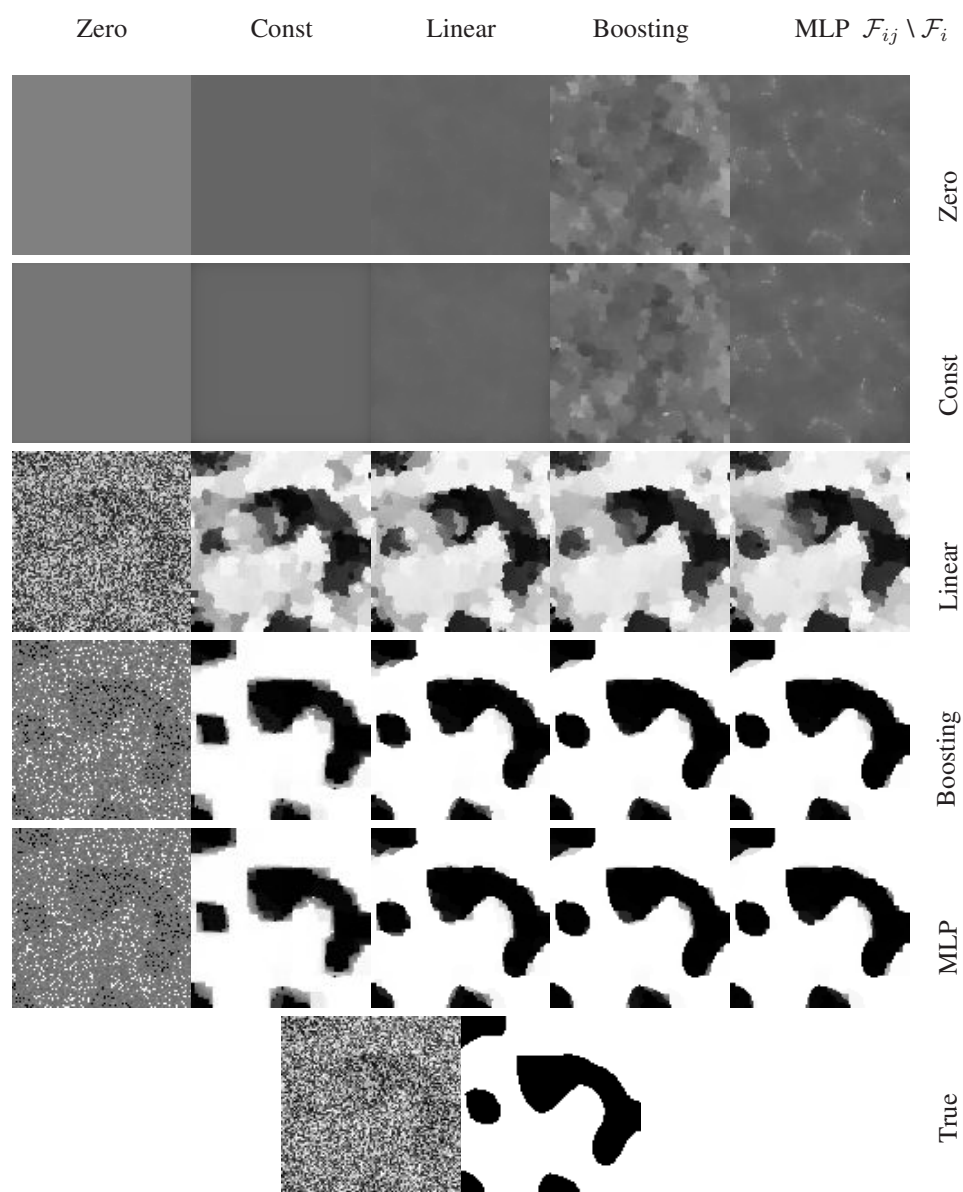

Figure 6: Example Predictions on the Denoising Dataset

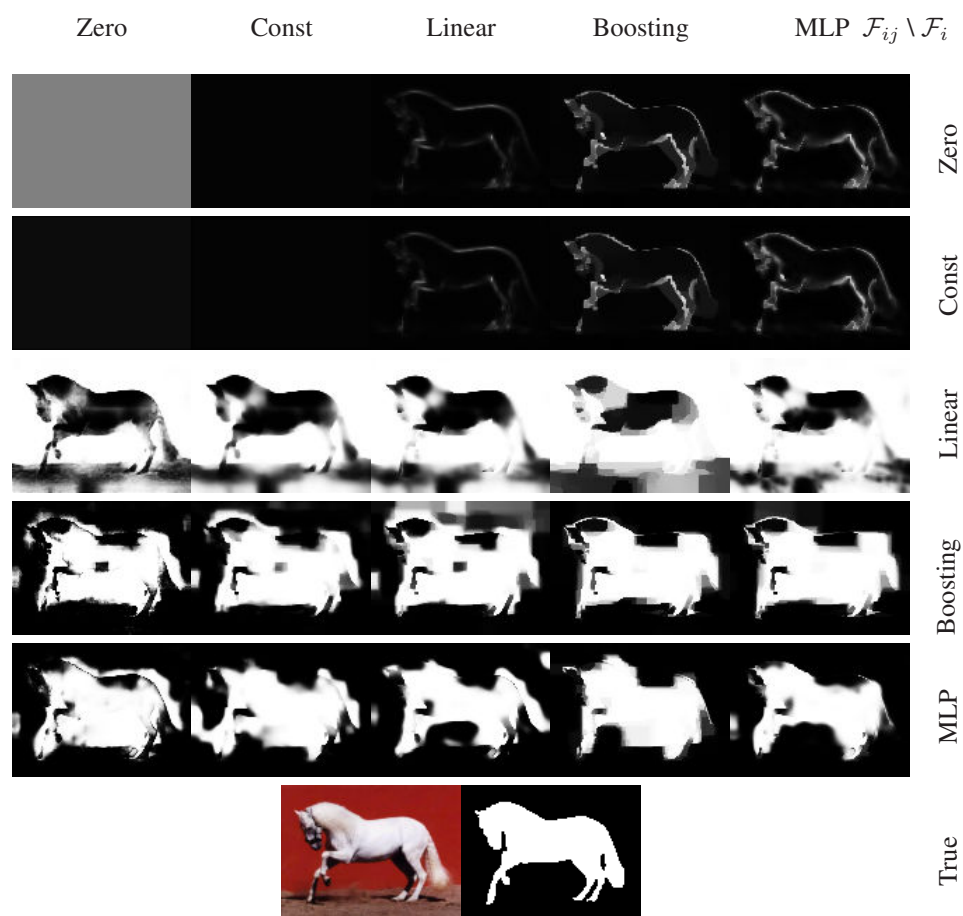

Figure 7: Example Predictions on the Horses Dataset

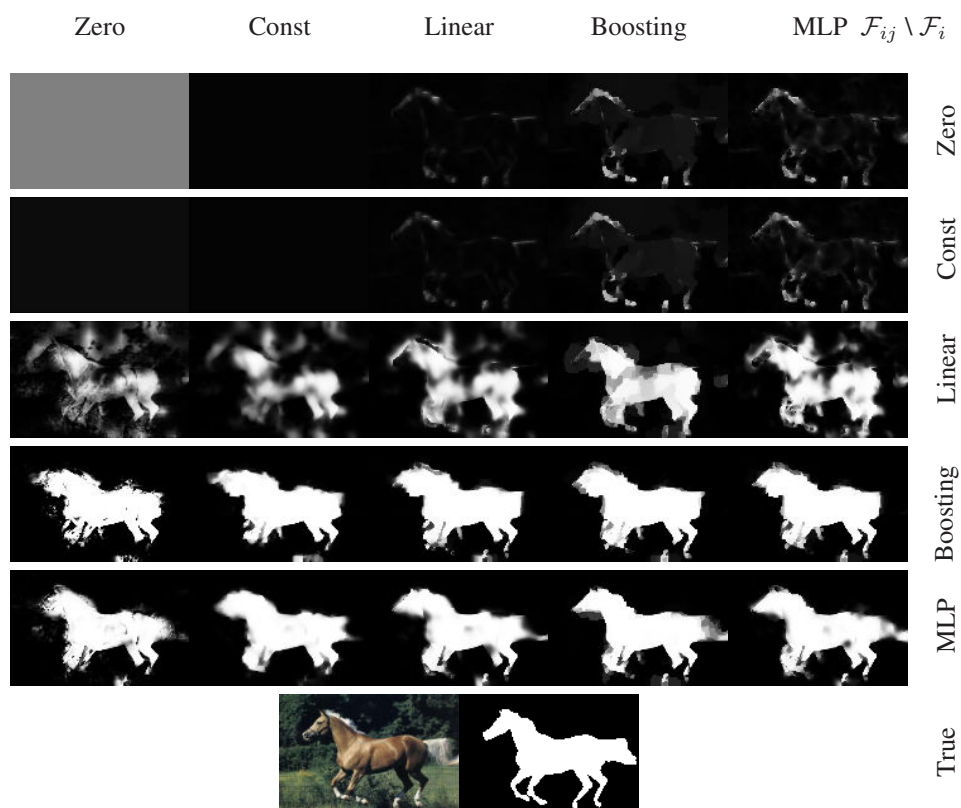

Figure 8: Example Predictions on the Horses Dataset

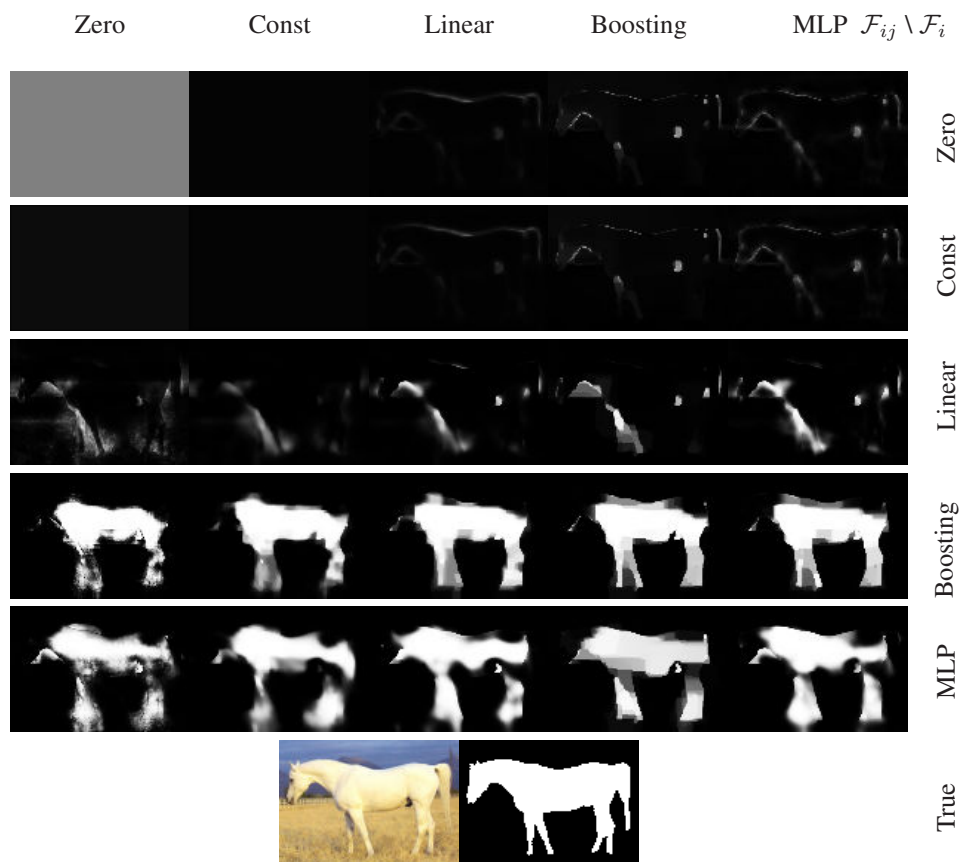

Figure 9: Example Predictions on the Horses Dataset

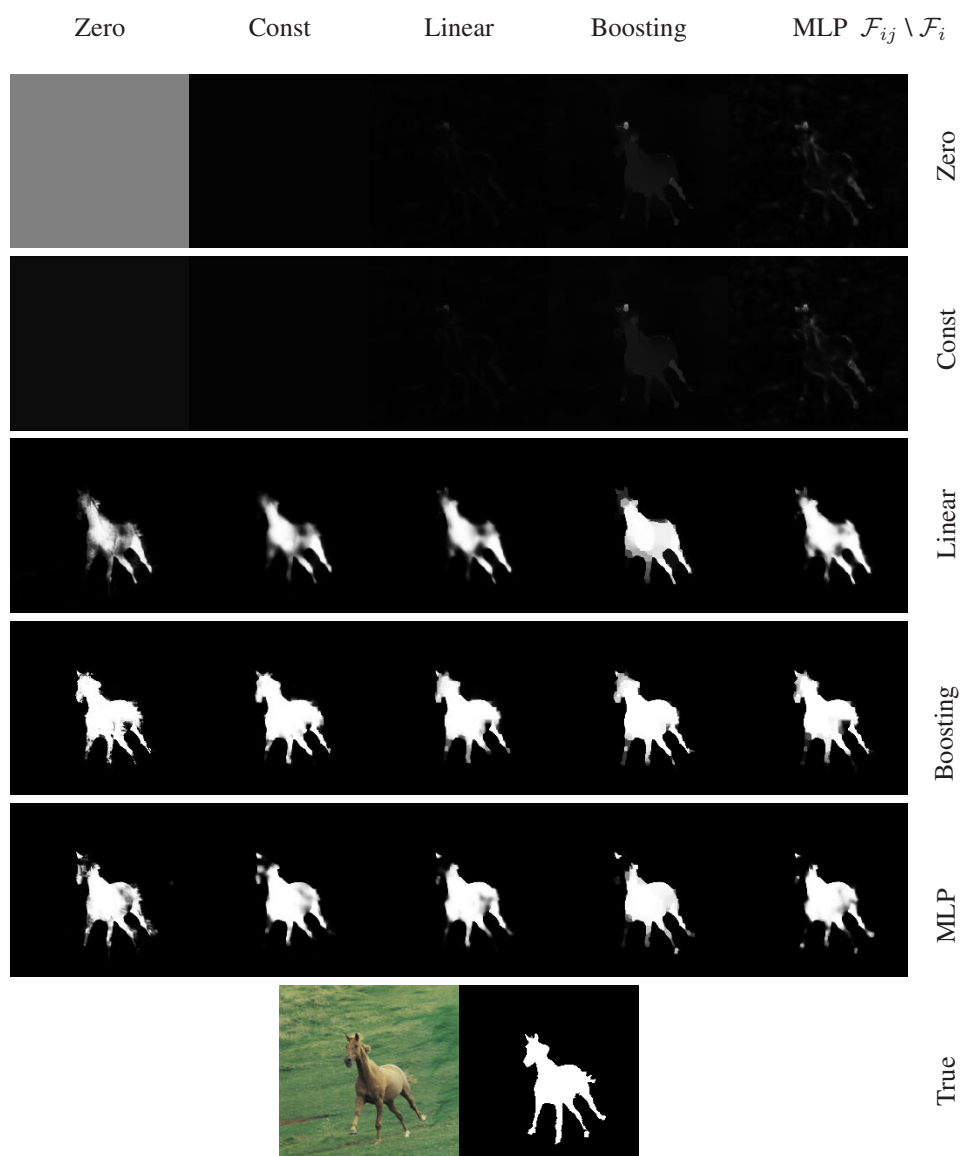

Figure 10: Example Predictions on the Horses Dataset



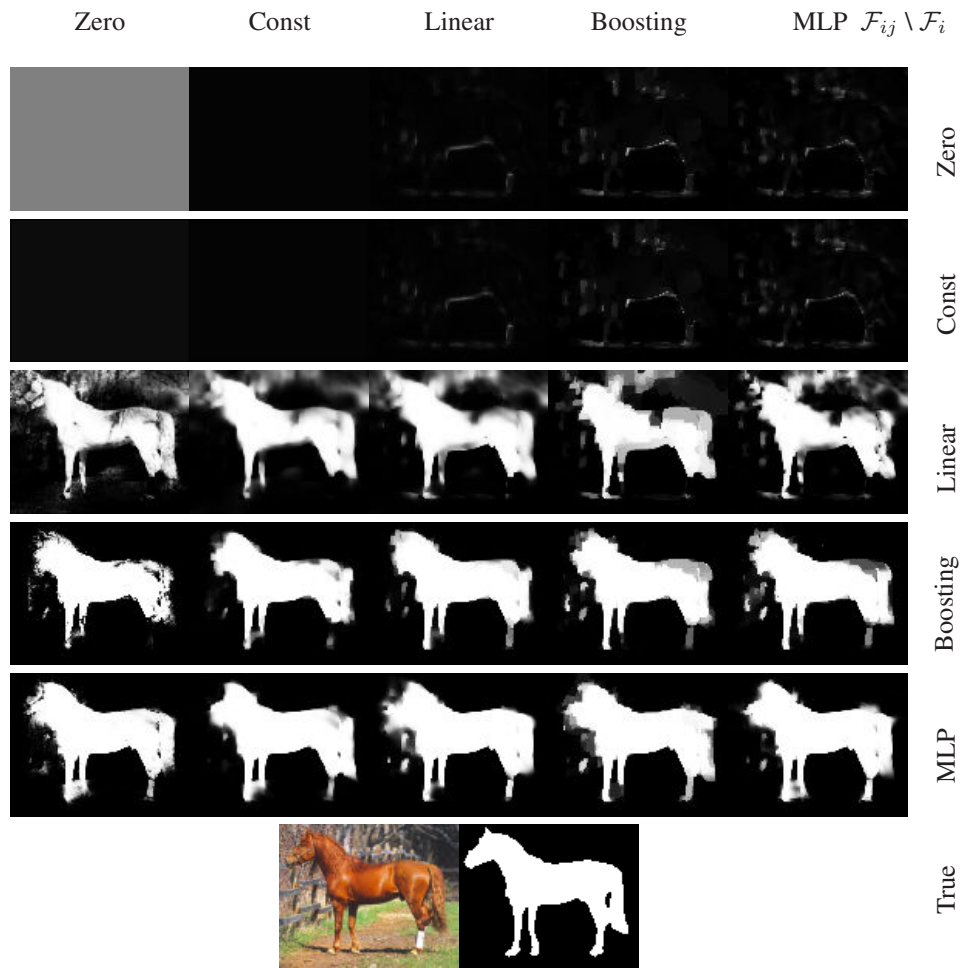

Figure 11: Example Predictions on the Horses Dataset

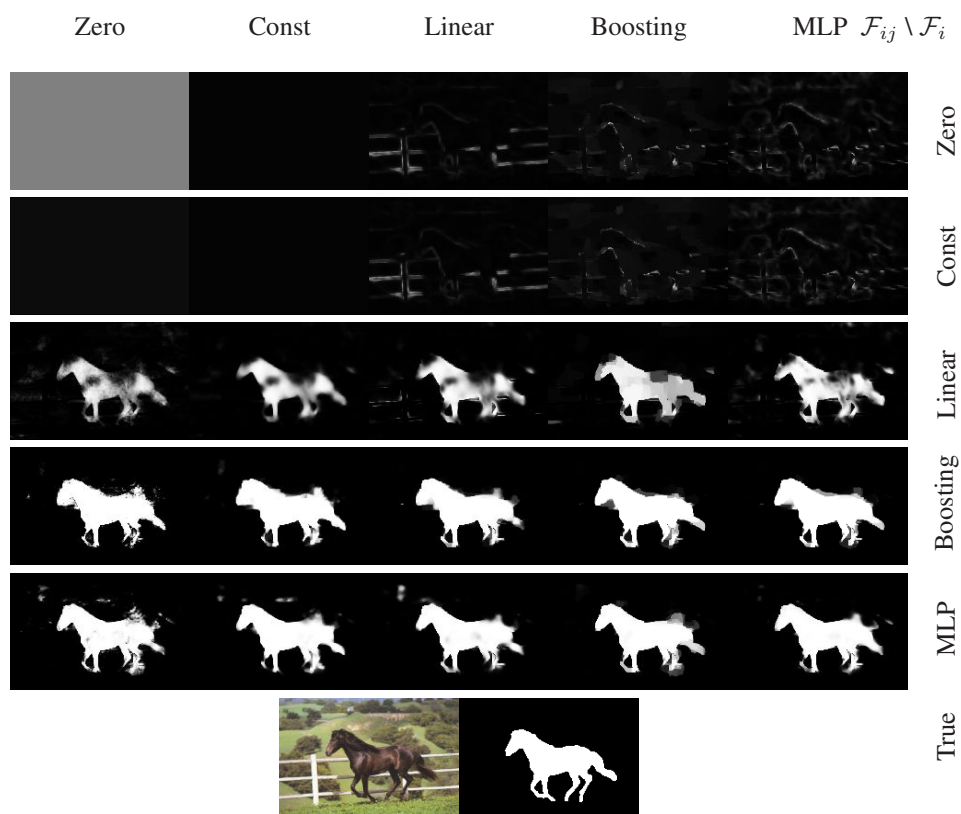

Figure 12: Example Predictions on the Horses Dataset
